# Supplementary material for: Two repetition time saturation transfer (TwiST) with spill-over correction to measure creatine kinase reaction rates in human hearts
Source: Springer Nature journal article supplement (doi:10.1186/s12968-015-0175-4), 2015-01-01
Supplement: MOESM1 [file 9767768]

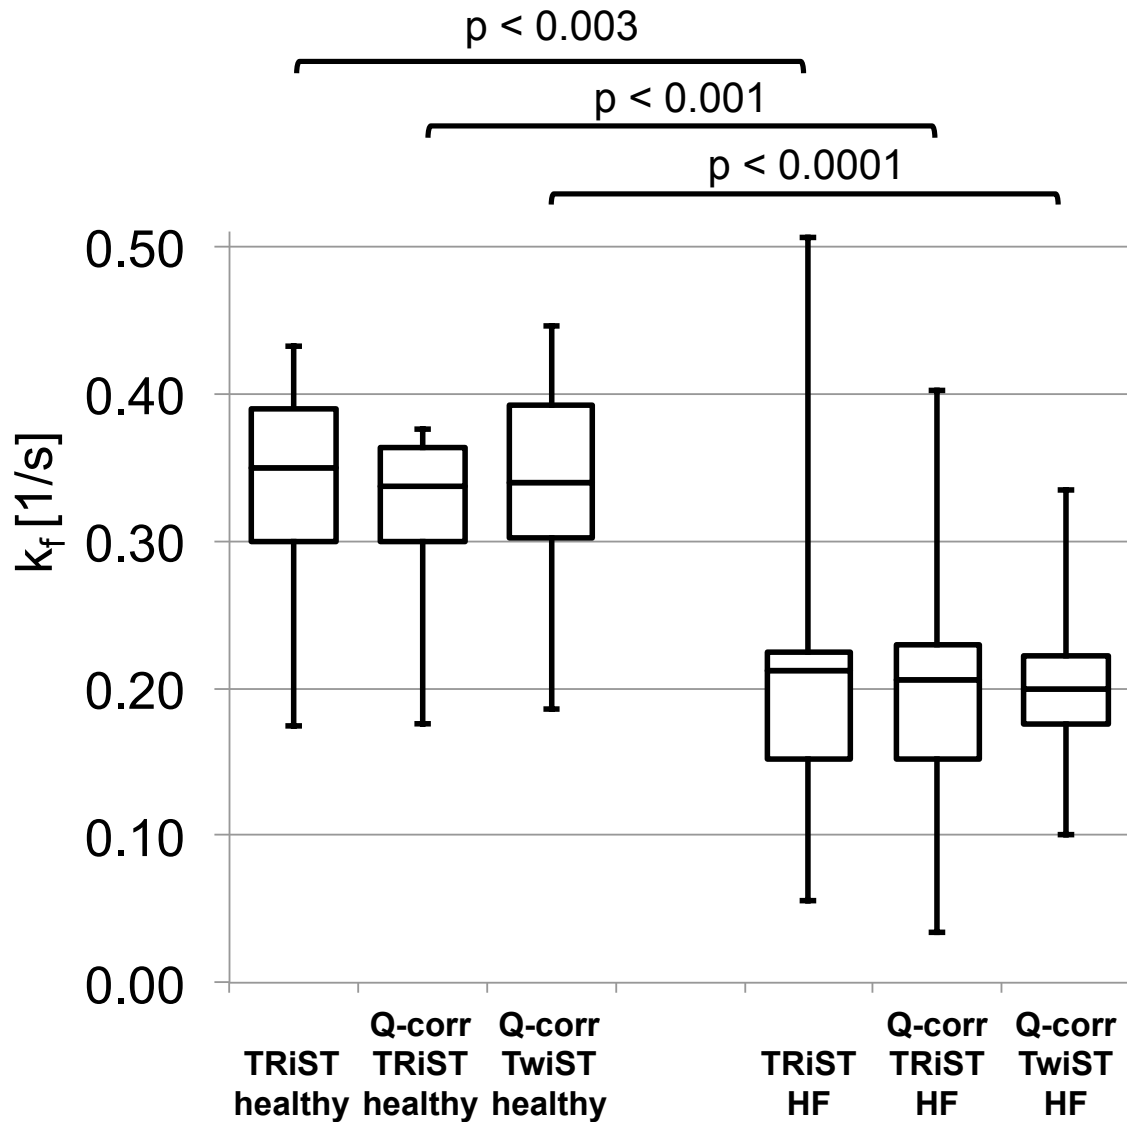

**Additional Figure:** Boxplot of cardiac CK pseudo-first-order rate constant  $k_f$  determined with TRiST, spill-over Q-corrected TRiST, and spill-over Q-corrected TwiST for healthy and heart failure patients.  $k_f$  measured with TRiST, with Q-corrected TRiST, and with Q-corrected TwiST are the same in both healthy and HF patients. Cardiac CK  $k_f$  in HF is significantly reduced compared to that in normal subjects.
